# Supplementary material
Source: MDPI journal article supplement (https://www.mdpi.com/2311-5637/8/11/578)
Supplement: s1 [file s1]

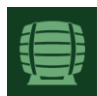

---

Supporting Information for

## **Improving the synthesis efficiency of amino acids such as L-lysine by assembling artificial cellulosome elements dockerin protein in vivo.**

Nan Li, Le Xue, Zirui Wang, Peng Du, Piwu Li, Jing Su, Jing Xiao, Min Wang, Junqing Wang, Ruiming Wang, Min Wang, Junqing Wang, and Ruiming Wang

Email: minw@tust.edu.cn (Min Wang), wjqtt.6082@163.com (Junqing Wang), and ruiming3k@163.com (Ruiming Wang)

A

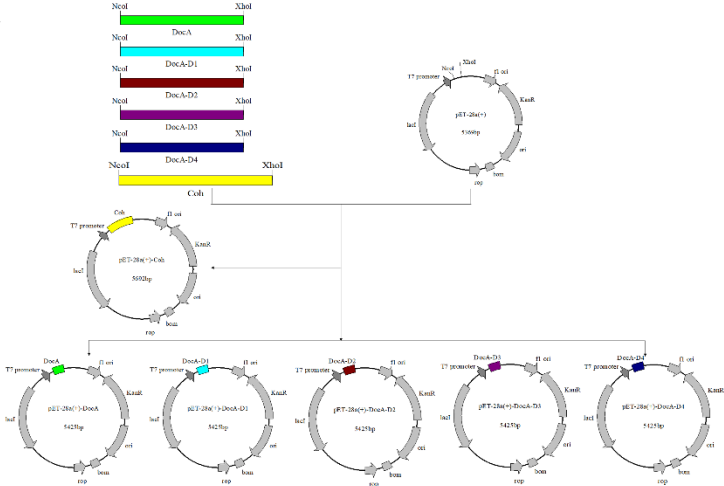

B

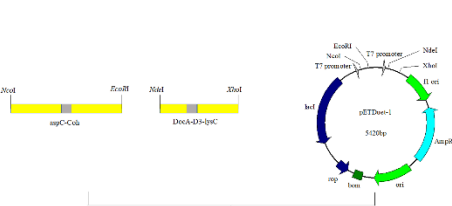

C

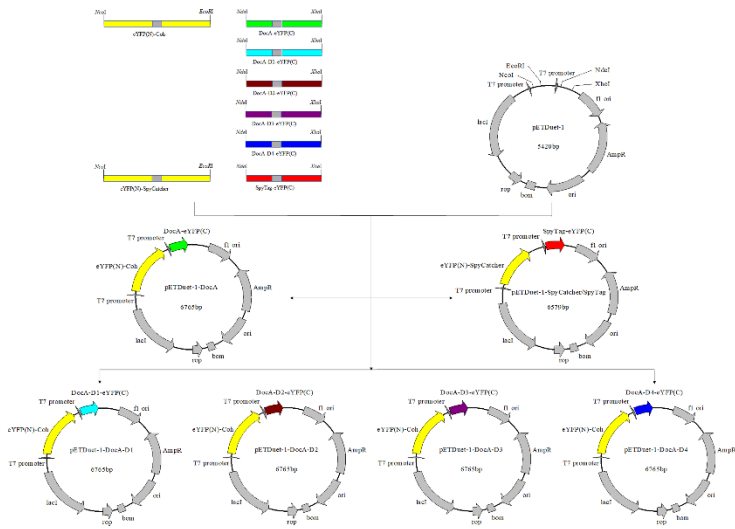

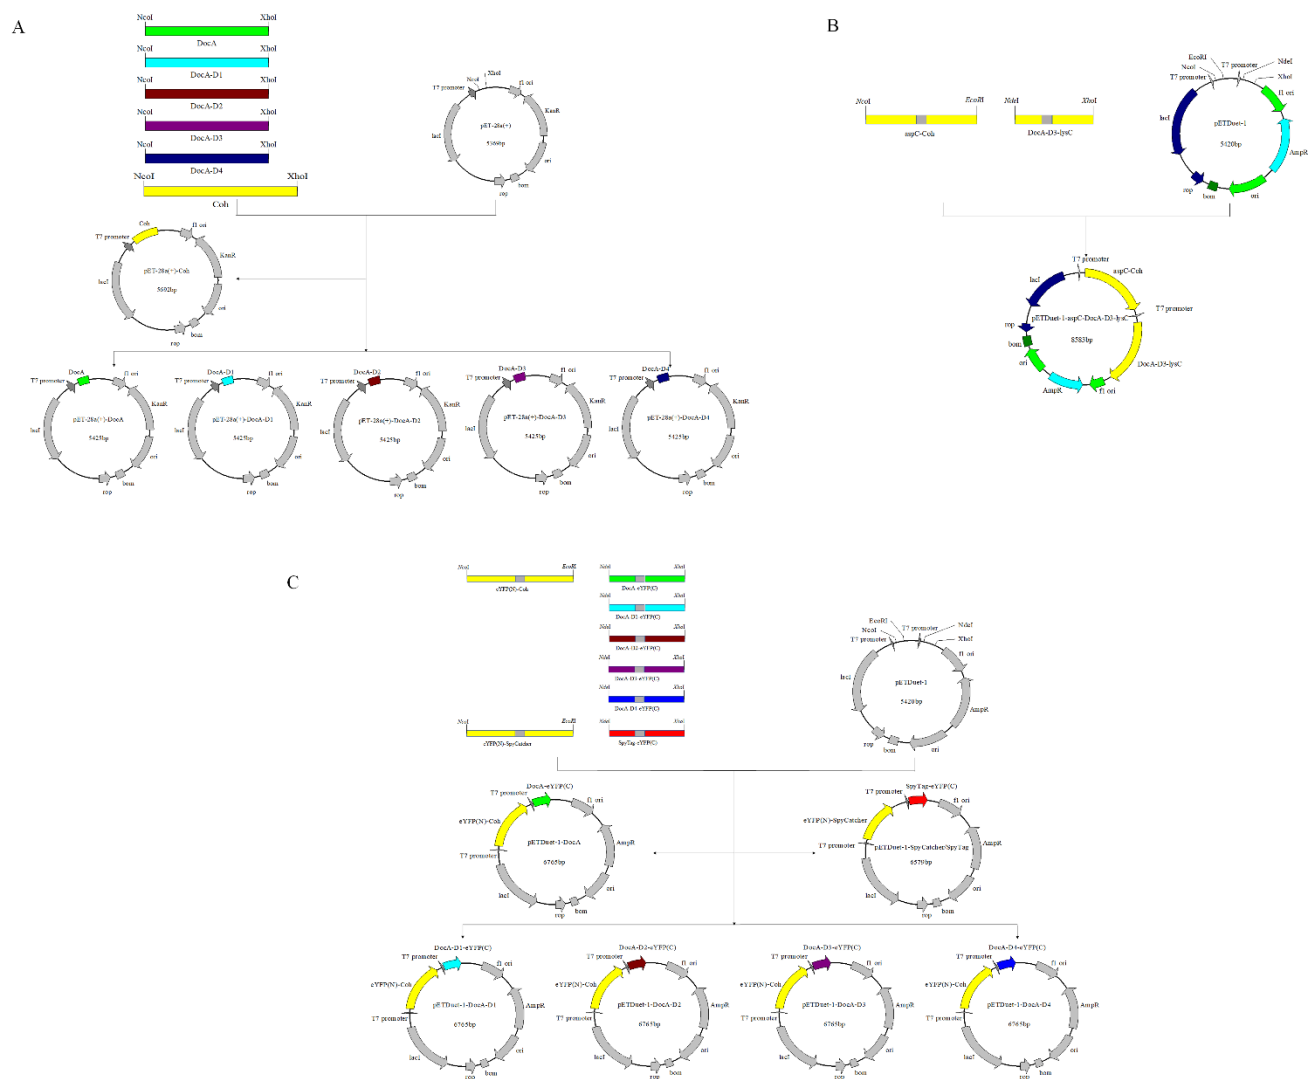

**Figure S1.** The construction and the schematic representation of the recombinant plasmids. A The construction and schematic representation of recombinant plasmid used in protein expression and purification; B The construction of assembly engineering strains QDE-DocA-D3; C The construction and schematic representation of the recombinant plasmid used in BIFC-FC.

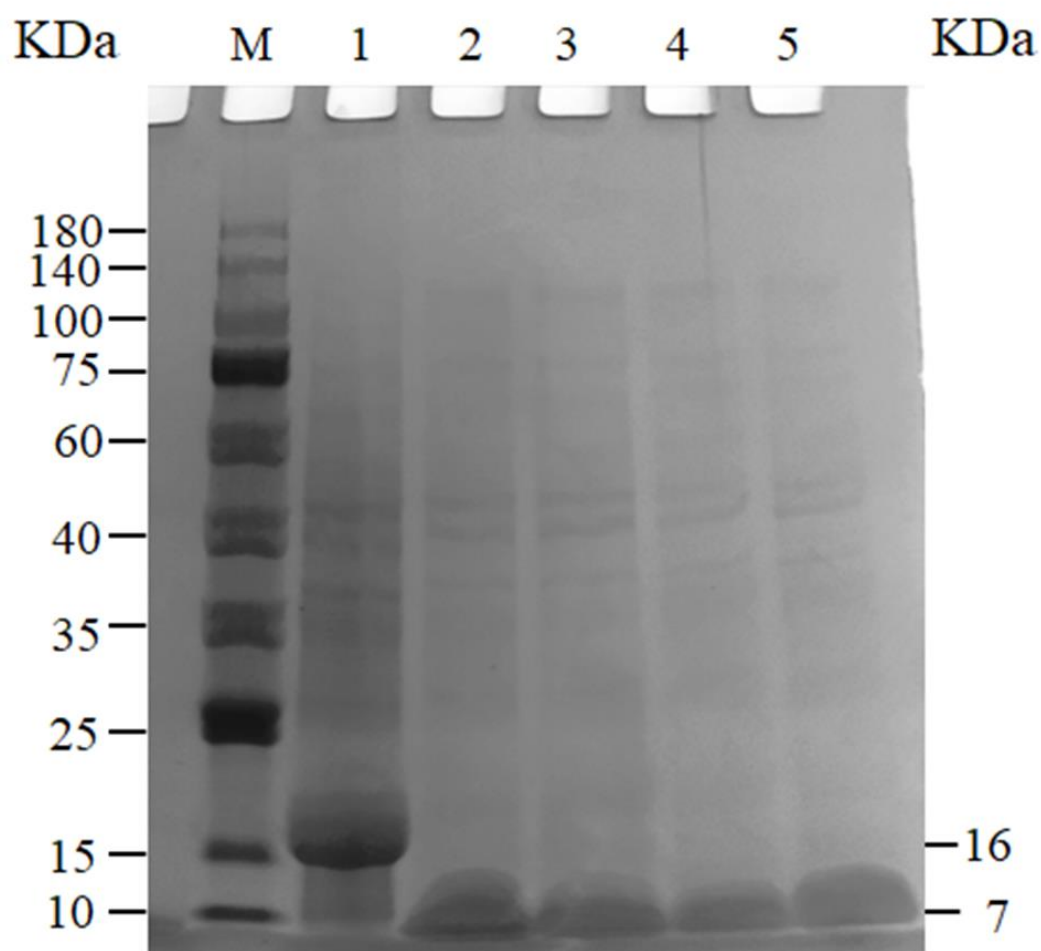

**Figure S2.** Electrophoretogram of purified proteins. M: marker 180 kDa; 1: 7 kDa of the initial docking protein DocA; 2: 16 kDa of the adhesion protein Coh; 3: 7 kDa of the docking protein mutant DocA-D1; 4: 7 kDa of the docking protein mutant DocA-D2; 5: 7 kDa of the docking protein mutant DocA-D3; 6: 7 kDa of the docking protein mutant DocA-D4.

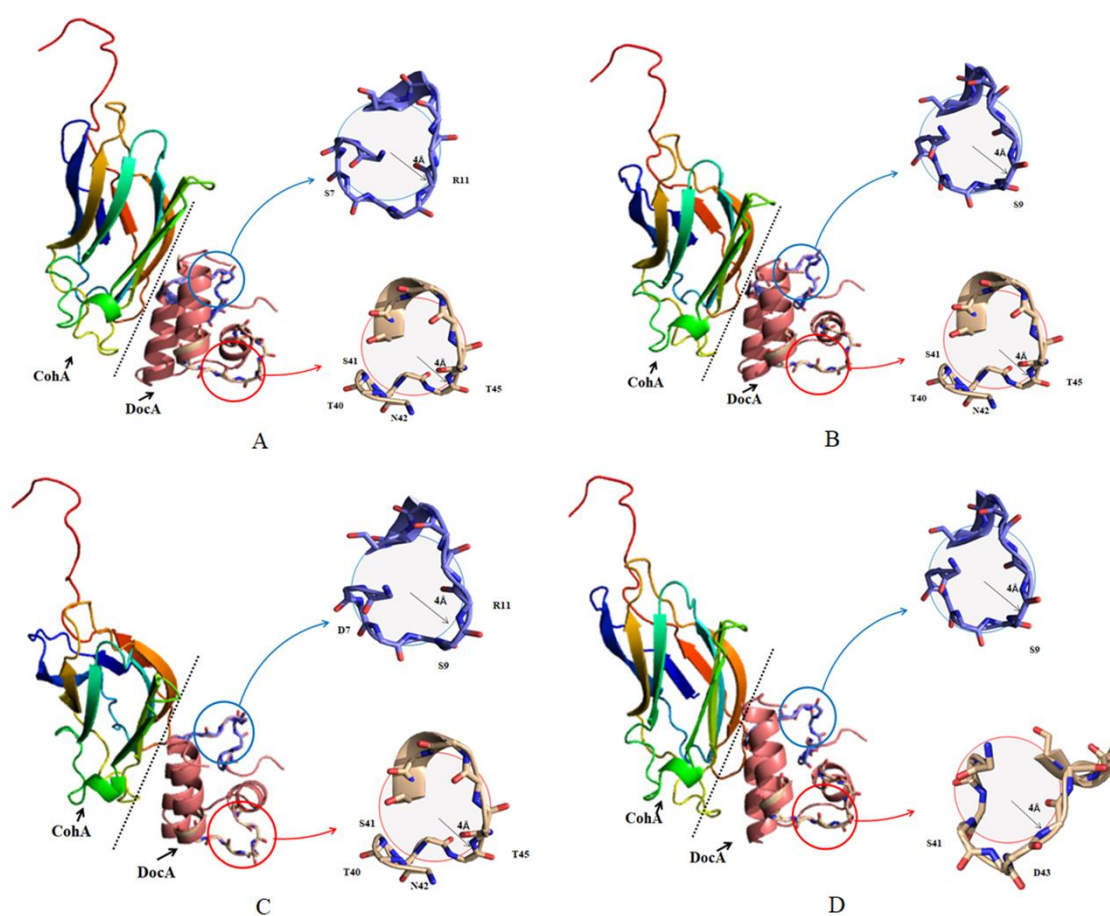

**Figure S3.** Changes in the key amino acid positions of DocA mutants. A The structure of DocA-D1/ Coh. B The structure of DocA-D2/ Coh. C The structure of DocA-D3/ Coh. D The structure of DocA-D4/ Coh.

**Table S1.** The list of verification primers in this study. Introduced restriction sites (RS) are underlined.

| Protein   | Primer name | Sequence (5'→3')                | Notes        |
|-----------|-------------|---------------------------------|--------------|
| Coh       | Coh-F       | TACCATGGGCTCTGATGGCGTTGTTGTTGA  | <i>NcoI</i>  |
|           | Coh-R       | GCTCGAGGGTCGCGCCTTTGGTCGGG      | <i>XhoI</i>  |
| DocA      | DocA-F      | ACCATGGGCGTTCTGCTGGGCGATGTTAAC  | <i>NcoI</i>  |
|           | DocA-R      | GTGCTCGAGTTTATCGATAACACGCAGCAG  | <i>XhoI</i>  |
| DocA-D1   | DocA-D1-F   | TACCATGGGCGTCCTGCTGGGTGATGTTAG  | <i>NcoI</i>  |
|           | DocA-D1-R   | GTGCTCGAGGATAACACGCAGCAGATAACG  | <i>XhoI</i>  |
| DocA-D2   | DocA-D2-F   | ACCATGGGCGTGCTGCTGGGTGATGTTAAC  | <i>NcoI</i>  |
|           | DocA-D2-R   | TGCTCGAGGATAACACGCAGCAGGTAAC    | <i>XhoI</i>  |
| DocA-D3   | DocA-D3-F   | TACCATGGGCGTCCTGCTGGGTGATGTTG   | <i>NcoI</i>  |
|           | DocA-D3-R   | GCTCGAGGATAACACGCAGCAGATAACGA   | <i>XhoI</i>  |
| DocA-D4   | DocA-D4-F   | TACCATGGGCGTGCTGCTGGGTGATGT     | <i>NcoI</i>  |
|           | DocA-D4-R   | TGCTCGAGGATAACACGCAGCAGATAACG   | <i>XhoI</i>  |
| eYFP-DocA | EY-coh-F1   | TACCATGGGCATGAGCAAGGGCGAGGA     | <i>NcoI</i>  |
|           | EY-coh-F2   | TGGCAGCAGCGATGGCGTGGTTGTGA      |              |
|           | EY-coh-R    | GCTCGAATTCCTTAGGTCGCACCTTTGGTCG | <i>EcoRI</i> |
|           | DocA-EY-F   | TATACATATGGTGCTGCTGGGTGACGTTAA  | <i>NdeI</i>  |
|           | DocA-EY-R1  | GCCACCGCTAATAACACGCAGCAGG       |              |
|           | DocA-EY-R2  | CAGACTCGAGTTATTTGTACAGTTTCG     | <i>XhoI</i>  |

|                         |               |                                  |              |
|-------------------------|---------------|----------------------------------|--------------|
| eYFP-DocA-D1            | DocA-D1-EY-F  | ATATACATATGGTACTATTAGGTGATGT     | <i>NdeI</i>  |
|                         | DocA-D1-EY-R1 | ACCGCTGATGACACGTAACAGGTA         |              |
|                         | DocA-D1-EY-R2 | AGACTCGAGTTATTTGTACAGTTCGT       | <i>XhoI</i>  |
| eYFP-DocA-D2            | DocA-D2-EY-F  | ATATACATATGGTACTATTAGGTGATGTTA   | <i>NdeI</i>  |
|                         | DocA-D2-EY-R1 | ACCGCTGATCACGCGCAACAGGTA         |              |
|                         | DocA-D2-EY-R2 | ACTCGAGTTATTTGTACAGTTCGT         | <i>XhoI</i>  |
| eYFP-DocA-D3            | DocA-D3-EY-F  | ATACATATGGTACTATTAGGGGATGTTGACGG | <i>NdeI</i>  |
|                         | DocA-D3-EY-R1 | ACCGCTGATGACACGGAGCAGGTAACG      |              |
|                         | DocA-D3-EY-R2 | CCAGACTCGAGTTATTTGTACAGTTCGTCCAT | <i>XhoI</i>  |
| eYFP-DocA-D4            | DocA-D4-EY-F  | ATATACATATGGTACTATTAGGAGATG      | <i>NdeI</i>  |
|                         | DocA-D4-EY-R1 | CCGCTAATAACACGCAACAGGTAAC        |              |
|                         | DocA-D4-EY-R2 | ACTCGAGTTATTTGTACAGTTCG          | <i>XhoI</i>  |
| eYFP-Spy-Catcher/SpyTag | EY-Scat-F1    | GGAGATATACCATGGGCATGTCAAAAGGAGAA | <i>NcoI</i>  |
|                         | EY-Scat-F2    | GCGGTGGTTCTATGAGCTATTATCATCACC   |              |
|                         | EY-Scat-R     | CCGAGCTCGAATTCGATGTGTGCGTCGC     | <i>EcoRI</i> |
|                         | Stag-EY-F     | GATATACATATGGCTCACATAGTAATGGTTGA | <i>NdeI</i>  |
|                         | Stag-EY-R1    | CACCGCTTTTCGTCGGTTTAT            |              |
|                         | Stag-EY-R2    | GACTCGAGTTACTTATACAGCTCATCCATACC | <i>XhoI</i>  |
